# Supplementary material
Source: publisher site journal article supplement (https://www.spandidos-publications.com/7319/downloadSupplementary)
Supplement: Supplementary file 1 [file downloadSupplementary]

## Sheet: TableS1_Glutamine_metabolism_re
Table SI. Glutamine metabolism-related genes.
Glutamine_metabolism
ANPEP
CKM
EIF4E
FBL
GPT
MAPK14
NCL
ALDH18A1
ASL
ASS1
CLN3
GLS
GLS2
GLUD1
GLUD2
GLUL
LGSN
NAGS
NOXRED1
OAT
OTC
PYCR1
PYCR2
PYCR3
SLC25A12
ADHFE1
ALDH4A1
ARG1
ARG2
ARHGAP11B
ASRGL1
ATP2B4
DAO
DDAH1
DDAH2
FAH
GAD1
GAD2
GOT1
GOT2
MIR21
NOS1
NOS2
NOS3
PRODH
PRODH2
AADAT
AGMAT
ALDH5A1
AMDHD1
ART4
ASNS
ASNSD1
ATCAY
CAD
CPS1
CTPS1
CTPS2
DGLUCY
FPGS
FTCD
GCLC
GCLM
GFPT1
GFPT2
GGT1
GLYATL1
GLYATL1B
GMPS
HAL
MECP2
MTHFS
NIT2
NR1H4
PFAS
PHGDH
PPAT
RIMKLA
RIMKLB
SIRT4
SLC38A1
SLC39A8
SLC7A11
SLC7A7
TAT
UROC1
CREBBP
FBLL1
N6AMT1
SIRT7
TRMT112
GATB
GATC
NADSYN1
QRSL1
EPB42
F13A1
TGM1
TGM2
TGM3
TGM4
TGM5
TGM6
TGM7
COX16
SLC25A13
TALDO1
COX10
COX5A
MDH1
NDUFB10
NDUFC2
PDP1
PNPO
TNFRSF11B
AQP1
ATP1A1
ATP1A2
ATP1A3
ATP1A4
ATP1B1
ATP1B2
ATP1B3
ATP1B4
CA2
CA4
FXYD2
PCK1
PCK2
SLC25A10
SLC38A3
SLC4A4
SLC9A3
KYAT1
